# Supplementary material for: Thermal insulation properties of lightweight, self-healing, and mesoporous carrageenan/PMMA cryogels
Source: Royal Society of Chemistry journal article supplement (doi:10.1039/d2ra06333f), 2023-01-01
Supplement: d2ra06333f1.pdf [file d2ra06333f1.pdf]

## Thermal Insulation Properties of Lightweight, Self-healing, and Mesoporous Carrageenan/PMMA Cryogels

<sup>1</sup>Akbar Mirzaei<sup>a</sup>, Shahrzad Javanshir<sup>a\*</sup>, Peyman Servati<sup>b</sup>

**Table S11.** Flammability test data for CM/PMMA cryogel

| Requirements for pass  | After flame time(s) |         | After glow time(s) | Pass or fail | UL-94 |
|------------------------|---------------------|---------|--------------------|--------------|-------|
|                        | Average             | Maximum |                    |              |       |
|                        | 5 ≤ 0               | 15 ≤    | 0 15 ≤             |              |       |
| <b>IM/PMMA cryogel</b> | 0                   | 0       | 0                  | pass         | V-0   |

<sup>1</sup> *a*Pharmaceutical and Heterocyclic Compounds Research Laboratory, Chemistry Department, Iran University of Science and Technology, Tehran, Iran

<sup>b</sup> *b*Department of Electrical and Computer Engineering, University of British Columbia, Vancouver, BC V6T 1Z4, Canada

[ak\\_mirzaei@chem.iust.ac.ir](mailto:ak_mirzaei@chem.iust.ac.ir)

[peymans@ece.ubc.ca](mailto:peymans@ece.ubc.ca)

[shjavan@iust.ac.ir](mailto:shjavan@iust.ac.ir), Tel: (+) 98-21-77240516
